# Supplementary material for: Dendritic Cell Based Tumor Vaccination in Prostate and Renal Cell Cancer: A Systematic Review and Meta-Analysis
Source: PubMed Central journal article supplement (PMC3080391; doi:10.1371/journal.pone.0018801), 2011-04-20
Supplement: pone.0018801.s002.pdf [file pone.0018801.s002.pdf]

**Table S1 – Additional information about clinical responses**

| Prostate            |                                                                                                                                    |                                              |                                                                |                                                                                             |    |    |    |                 |    |                                                                                                                                                                                                                                                 |                                                                                                                        |  |
|---------------------|------------------------------------------------------------------------------------------------------------------------------------|----------------------------------------------|----------------------------------------------------------------|---------------------------------------------------------------------------------------------|----|----|----|-----------------|----|-------------------------------------------------------------------------------------------------------------------------------------------------------------------------------------------------------------------------------------------------|------------------------------------------------------------------------------------------------------------------------|--|
| Reference           | Patients                                                                                                                           | Progressive disease before study enrollment? | Clinical response criteria                                     | Information about response evaluation                                                       | CR | PR | MR | SD              | PD | Additional information about clinical response                                                                                                                                                                                                  | Additional information about clinical response interpretation                                                          |  |
| Barrou, 2004        | 26 BCR<br>(24 vaccinated; 1 patient too low DC number, 1 patient refused)                                                          | mandatory                                    | PSA course                                                     |                                                                                             |    |    |    | 11              | 13 | Molecular tumor cell clearance in 6/6 investigated patients (3 of these with PD)                                                                                                                                                                | Stable diseases concluded analogue PSA-WG criteria (PSA drop <40%)                                                     |  |
| Burch, 2000         | 13 metastatic                                                                                                                      | mandatory                                    | NPCP/PSA-WG analogue                                           | Restaging 4 weeks after last vaccination, then every 8 weeks                                |    | 3  |    | 9               | 1  | Radiologically no change                                                                                                                                                                                                                        | PR: patients with PSA drop >50%<br>SD: concluded from TTP (TTP 30–274 days after registration)                         |  |
| Fong, 2001          | 21 metastatic                                                                                                                      | mandatory                                    | NPCP/PSA-WG analogue                                           | Restaging 4 months after vaccination                                                        |    |    |    | 6               | 15 | 6 x PSA drop<br>SD confirmed by CT and bone scans<br>Correlation between clinical responses and T-cell responses                                                                                                                                |                                                                                                                        |  |
| Fuessel, 2006       | 7 metastatic + 1 BCR                                                                                                               | mandatory                                    | NPCP/PSA-WG analogue                                           | Restaging 2 weeks and 3 months after last vaccination                                       |    | 1  |    | 3               | 4  | Radiologically no change                                                                                                                                                                                                                        |                                                                                                                        |  |
| Heiser, 2002        | 16 metastatic (13 evaluable)                                                                                                       | not mandatory                                | PSA log slope                                                  |                                                                                             |    |    |    |                 |    | 1/7 PSA decrease + 5/7 PSA log slope reduction<br>3 patients with transient molecular clearance                                                                                                                                                 |                                                                                                                        |  |
| Higano, 2009        | 65 metastatic + 33 in placebo group (APC without PA2024)                                                                           | mandatory                                    | TTP analogue WHO criteria                                      | Restaging every 8 weeks until week 32, then every 12 weeks                                  |    |    |    |                 |    | TTP treatment vs. placebo group: 10.9 vs. 9.9 months (ns)<br>OS: 19.0 vs. 15.7 months (ns) (after adjusting baseline imbalances of LDH, PSA, localisation of disease, number of bone metastases, and weight OS improvement was significant)     |                                                                                                                        |  |
| Hildenbrand, 2007   | 12 metastatic                                                                                                                      | mandatory                                    | NPCP/PSA-WG analogue                                           | Restaging 3 weeks after last vaccination                                                    |    | 1  | 1  | 4               | 6  | PR and MR due to radiological response<br>PSA course: PSA decrease in 2 patients (1 PR, 1 SD), PSA velocity decrease in 4 patients, PSA velocity stable in 1 patient, PSA velocity increase in 5 patients                                       |                                                                                                                        |  |
| Kantoff, 2010       | 341 metastatic + 171 in placebo group (APC without PA2024)                                                                         | mandatory                                    | OS and TTP analogue WHO criteria                               | Restaging 2, 10, 22 and 30 weeks after last vaccination, thereafter every 12 weeks          |    |    |    |                 |    | OS treatment vs. placebo group: 25.8 vs. 21.7 months (sig)<br>TTP: 14.6 vs. 14.4 months (ns)<br>OSR (36 months): 31.7% vs. 23.0%<br>1 PR in treatment group<br>PSA course: reduction > 50% in 8/311 treated patients vs. 2/153 in placebo group |                                                                                                                        |  |
| Mu, 2005            | 14 metastatic + 6 BCR (5 vaccinated, 1 patient progressive disease before vaccination)                                             | mandatory                                    | NPCP/PSA-WG analogue                                           | First assessment 2 weeks after last vaccination (bone scan: 9 weeks after last vaccination) |    |    |    | 11              | 8  | PSA course: decreased PSA log slope in 13 patients<br>T-cell responses correlate with clinical response                                                                                                                                         |                                                                                                                        |  |
| Murphy, 2000        | 28 metastatic (of these, 11 patients previously vaccinated with lower DC dose; mean time since previous last vaccination 405 days) | not mandatory                                | NPCP/PSA-WG analogue                                           | No information about time of restaging                                                      | 1  | 4  |    | 1 (previous PR) | 21 |                                                                                                                                                                                                                                                 | 1 patient with previous CR before re-vaccination was excluded from the systematic review (the authors judged it as CR) |  |
| Pandha, 2004        | 9 metastatic + 2 BCR                                                                                                               | not mandatory                                | RECIST criteria (for PD also PSA course used)                  | First evaluation 4 weeks after last vaccination                                             |    |    |    | 4               | 7  | PSA course:<br>PSA decrease in 1/11 patients, PSA stable in 1/11 patients, PSA velocity reduction in 1/11 patients<br>increased PSA doubling time in 6/11 patients                                                                              |                                                                                                                        |  |
| Perambakam, 2006    | 7 metastatic + 7 locally advanced                                                                                                  | not mandatory                                | n.d.                                                           | n.d.                                                                                        |    |    |    |                 |    | n.d.                                                                                                                                                                                                                                            | n.d.                                                                                                                   |  |
| Small, 2000         | 12 metastatic + 19 BCR                                                                                                             | mandatory                                    | PSA course, additionally radiographic courses described        | PSA course every 4 weeks                                                                    |    | 3  |    | 28              |    | Patients with PR radiologically stable<br>Correlation between cellular immune response and TTP and between number of DC and TTP                                                                                                                 | SD: concluded from TTP (always ≥ 8 weeks)                                                                              |  |
| Small, 2006         | 82 metastatic + 45 in placebo group (APC without PA2024)                                                                           | mandatory                                    | TTP analogue WHO criteria                                      | Restaging every 8 weeks until week 32, then every 12 weeks                                  |    |    |    |                 |    | TTP treatment group vs. placebo group: 11.7 vs. 10.0 months (ns)<br>OS: 25.9 vs. 21.4 months (sig)<br>OSR (36 months): 34% vs. 11% (sig)<br>[previous publication (Lee, 2003): TTP significant better for patients with Gleason score < 7]      |                                                                                                                        |  |
| Su, 2005            | 20 metastatic                                                                                                                      | not mandatory                                | PSA course, but only median information for vaccination groups | PSA course biweekly for 6 weeks, then after one month, afterwards every 4 months            |    |    |    |                 |    | PSAdt improved in group with higher number of vaccinations<br>Molecular micrometastases clearing (RNA) in 4/4 evaluable patients of LAMP-hTERT and 5/6 patients of hTERT group<br>"no objective clinical response"                              |                                                                                                                        |  |
| Thomas-Kaskel, 2006 | 12 metastatic                                                                                                                      | mandatory                                    | NPCP/PSA-WG analogue                                           | Restaging 2 weeks after last vaccination                                                    |    |    |    | 6               | 6  | PSA course: 4/12 patients with significant decrease in log PSA slope;<br>1/12 patient with PSA decrease (all SD)<br>OS correlated with positive DTH                                                                                             |                                                                                                                        |  |
| Waeckerle-Men, 2006 | 6 metastatic                                                                                                                       | mandatory                                    | PSA course, additionally radiographic courses described        | Restaging after last vaccination, 6 weeks thereafter, and then every 3 months               |    |    |    |                 | 3  | Clinical course (PD) specified only for 3 patients<br>PSA-doubling time improved in 3 immunological responding patients;<br>1 patient with transient PSA decrease                                                                               |                                                                                                                        |  |

**Table S1 – Additional information about clinical responses**

| RCC                    |                                                                                                                                   |                                                                     |                                                                                     |                                                                                     |    |    |    |            |    |                                                                                                                                                                                                                                                                    |                                                                            |  |
|------------------------|-----------------------------------------------------------------------------------------------------------------------------------|---------------------------------------------------------------------|-------------------------------------------------------------------------------------|-------------------------------------------------------------------------------------|----|----|----|------------|----|--------------------------------------------------------------------------------------------------------------------------------------------------------------------------------------------------------------------------------------------------------------------|----------------------------------------------------------------------------|--|
| Reference              | Patients                                                                                                                          | Progressive disease before study enrollment?                        | Clinical response criteria                                                          | Information about response evaluation                                               | CR | PR | MR | SD         | PD | Additional information about clinical response                                                                                                                                                                                                                     | Additional information about clinical response interpretation              |  |
| Berntsen, 2008         | 30 metastatic (27 evaluable: 2 patients died before first vaccination, 1 patient withdrew informed consent after 4th vaccination) | mandatory                                                           | RECIST criteria                                                                     | Restaging after 6th and 10th vaccination and then every 3 months                    |    |    |    | 13         | 14 | According to RECIST SD categorization only if duration was $\geq$ 8 weeks<br>duration of SD: 10/13 patients >6 mo, 5/13 patients > 12mo<br>median OS: 16.6 mo; median PFS: 2.7 mo                                                                                  |                                                                            |  |
| Bleumer, 2007          | 8 metastatic (6 evaluable)                                                                                                        | mandatory                                                           | WHO/RECIST criteria suggested                                                       | Restaging 4 weeks after last vaccination                                            |    |    |    |            | 6  |                                                                                                                                                                                                                                                                    |                                                                            |  |
| Dannull, 2005          | 10 metastatic                                                                                                                     | not mandatory                                                       | n.s.                                                                                | no information on clinical response                                                 |    |    |    |            |    | follow-up interval from last vaccination to last staging follow-up specified and classification of patients to be alive with disease (AWD) or dead of disease (DOD)                                                                                                |                                                                            |  |
| Gitlitz, 2003          | 14 metastatic (12 vaccinated + 2 patients progressive before vaccination)                                                         | enrollment before nephrectomy                                       | WHO analogue                                                                        | Restaging 3 months after last vaccination and every 3 months                        |    | 1  |    | 3          | 8  |                                                                                                                                                                                                                                                                    |                                                                            |  |
| Höfl, 2002             | 35 metastatic                                                                                                                     | enrollment before nephrectomy                                       | WHO/RECIST criteria suggested (described responses in accordance with WHO criteria) | Restaging 1 month after each vaccination                                            | 2  | 1  |    | 7          | 25 | 8 PD before 3rd vaccination                                                                                                                                                                                                                                        |                                                                            |  |
| Kim, 2007              | 9 metastatic                                                                                                                      | enrollment before nephrectomy                                       | WHO criteria                                                                        | Restaging 4 weeks after each vaccination cycle                                      |    | 1  |    | 5          | 3  |                                                                                                                                                                                                                                                                    |                                                                            |  |
| Märten, 2002           | 15 metastatic (only 11 patients vaccinated with tumor lysate pulsed DC)                                                           | mandatory                                                           | WHO criteria                                                                        | Restaging 3 weeks after last vaccination                                            |    | 1  |    | 7          | 7  | 2 patients with SD received only KLH pulsed DC and 2 patients with PD received unpulsed DC; 2 patients with tumor lysate pulsed DC (1 SD, 1 PD) and 1 patient with KLH only pulsed DC received additionally IFN, IL-2 and 5-FU after the end of vaccination period | For individual analysis only patients with tumor lysate pulsed DC included |  |
| Oosterwijk-Wakka, 2002 | 12 metastatic                                                                                                                     | enrollment before nephrectomy                                       | WHO/RECIST criteria suggested                                                       | Restaging 3 weeks after last vaccination, follow-up at 6 weeks intervals            |    |    |    | 8          | 4  |                                                                                                                                                                                                                                                                    |                                                                            |  |
| Schwab, 2009           | 18 metastatic                                                                                                                     | mandatory                                                           | RECIST criteria                                                                     | Follow-up for responding and stable patients every 3 months                         | 3  | 6  |    | 6          | 3  | responses occurred after induction (first 2 vaccines) or after maintenance vaccination (vaccination 3-5); information on 'best response' (without specification of time point)                                                                                     |                                                                            |  |
| Su, 2003               | 15 metastatic (10 evaluable)                                                                                                      | not mandatory                                                       | Not specified (clinical course described)                                           |                                                                                     |    |    |    | 1 (> 22mo) | 1  | Remaining 8 patients received further therapy                                                                                                                                                                                                                      |                                                                            |  |
| Wei, 2007              | 10 metastatic                                                                                                                     | not mandatory                                                       | WHO/RECIST suggested (described responses in accordance with WHO criteria)          | Restaging 3 months after last vaccination                                           |    | 1  |    | 3          | 6  |                                                                                                                                                                                                                                                                    |                                                                            |  |
| Wierecky, 2006         | 20 metastatic                                                                                                                     | 17/20 patients progressive, 2/20 not specified, 1/20 stable disease | WHO criteria                                                                        | Restaging between 1 and 2.5 weeks after last vaccination and every month thereafter | 1  | 2  | 2  | 5          | 10 | Stronger cellular immune response in clinical responding patients                                                                                                                                                                                                  |                                                                            |  |
