# Supplementary material for: Dendritic Cell Based Tumor Vaccination in Prostate and Renal Cell Cancer: A Systematic Review and Meta-Analysis
Source: PubMed Central journal article supplement (PMC3080391; doi:10.1371/journal.pone.0018801), 2011-04-20
Supplement: pone.0018801.s006.pdf [file pone.0018801.s006.pdf]

**Table S5 – Additional information on individual data extraction**

| <b>Prostate</b>            |                                       |                                                                                 |                                                                                                                                         |                                                               |
|----------------------------|---------------------------------------|---------------------------------------------------------------------------------|-----------------------------------------------------------------------------------------------------------------------------------------|---------------------------------------------------------------|
| <b>Reference</b>           | <b>Patients individually analysed</b> | <b>Clinical response</b>                                                        | <b>Number of DC and number of vaccinations / dose</b>                                                                                   | <b>Immune response</b>                                        |
| <b>Barrou, 2004</b>        | 24                                    | No individual analysis                                                          | Fixed number of vaccinations<br>Median number of DC calculated                                                                          | Individual information in table                               |
| <b>Burch, 2000</b>         | 13                                    | Information in results section and figures                                      | Mean dose of treatment groups                                                                                                           | Individual information in results section and figures         |
| <b>Fong, 2001</b>          | 21                                    | Individual information in table                                                 | Individual information in table                                                                                                         | Individual information in table                               |
| <b>Fuessel, 2006</b>       | 8                                     | Individual information in table                                                 | Fixed dose                                                                                                                              | Individual information in table                               |
| <b>Heiser, 2002</b>        | 13                                    | No individual analysis                                                          | Fixed dose                                                                                                                              | Individual information in table and figures                   |
| <b>Higano, 2009</b>        |                                       | No individual analysis                                                          | No individual analysis                                                                                                                  | No individual analysis                                        |
| <b>Hildenbrand, 2007</b>   | 12                                    | Individual information in table                                                 | Fixed dose                                                                                                                              | Individual information in table                               |
| <b>Kantoff, 2010</b>       |                                       | No individual analysis                                                          | No individual analysis                                                                                                                  | No individual analysis                                        |
| <b>Mu, 2005</b>            | 19                                    | Individual information in table                                                 | Fixed dose                                                                                                                              | Individual information in table                               |
| <b>Murphy, 2000</b>        | 27                                    | Individual information in table only for responders (other patients 'all PD')   | Individual information in table only for responders, for other patients mean numbers of vaccinated DC and exact numbers of vaccinations | Not investigated                                              |
| <b>Pandha, 2004</b>        | 11                                    | Individual information in table                                                 | Median number of DC<br>Fixed number of vaccinations                                                                                     | Individual information in results section, tables and figures |
| <b>Perambakam, 2006</b>    | 14                                    | Not investigated                                                                | Median number of DC<br>Fixed number of vaccinations                                                                                     | Individual information in table                               |
| <b>Small, 2000</b>         | 31                                    | Results section and conclusion from TTP for SD                                  | Median number of DC and vaccinations                                                                                                    | Information in results section                                |
| <b>Small, 2006</b>         |                                       | No individual analysis                                                          | No individual analysis                                                                                                                  | No individual analysis                                        |
| <b>Su, 2005</b>            | 20                                    | No individual information                                                       | Fixed dose                                                                                                                              | Individual information in table                               |
| <b>Thomas-Kaskel, 2006</b> | 12                                    | Individual information in table                                                 | Individual information in table                                                                                                         | Individual information in table                               |
| <b>Waeckerle-Men, 2006</b> | 6                                     | Individual information in results section, but PD specified only for 3 patients | Fixed dose                                                                                                                              | Individual information in results section and figures         |

| <b>RCC</b>                    |                                       |                                                                                      |                                                             |                                                              |
|-------------------------------|---------------------------------------|--------------------------------------------------------------------------------------|-------------------------------------------------------------|--------------------------------------------------------------|
| <b>Reference</b>              | <b>Patients individually analysed</b> | <b>Clinical response</b>                                                             | <b>Number of DC and number of vaccinations / dose</b>       | <b>Immune response</b>                                       |
| <b>Berntsen, 2008</b>         | 27                                    | Individual information in table                                                      | Individual information in table, fixed dose per vaccination | No individual analysis                                       |
| <b>Bleumer, 2007</b>          | 6                                     | Information in results section                                                       | Mean number of DC<br>Fixed number of vaccinations           | Individual information in table                              |
| <b>Dannull, 2005</b>          | 10                                    | No individual analysis                                                               | Fixed dose                                                  | Individual information in results section, table and figures |
| <b>Gitlitz, 2003</b>          | 12                                    | Individual information in table                                                      | Individual information in table                             | Information in results section                               |
| <b>Hörtl, 2002</b>            | 27                                    | Individual information in table                                                      | Individual information in table                             | Individual information in results section and figures        |
| <b>Kim, 2007</b>              | 9                                     | Individual information in table                                                      | Fixed dose                                                  | Individual information in table                              |
| <b>Märten, 2002</b>           | 11                                    | Individual information in table; only patients with tumor lysate pulsed DC included  | Individual information in table                             | Individual information in table                              |
| <b>Oosterwijk-Wakka, 2002</b> | 12                                    | Individual information in table                                                      | Fixed number of vaccinations Mean number of DC              | Information in results section                               |
| <b>Schwaab, 2009</b>          | 18                                    | Individual information in table                                                      | Individual information in table, fixed dose per vaccination | No individual analysis                                       |
| <b>Su, 2003</b>               | 10                                    | Individual information for 2 patients (other patients received additional treatment) | Fixed dose                                                  | Individual information in table                              |
| <b>Wei, 2007</b>              | 10                                    | Individual information in table                                                      | Individual information in table                             | Individual information in results section and figures        |
| <b>Wierecky, 2006</b>         | 20                                    | Individual information in table                                                      | Individual information in table                             | Individual information in table                              |
