# Supplementary material for: Dendritic Cell Based Tumor Vaccination in Prostate and Renal Cell Cancer: A Systematic Review and Meta-Analysis
Source: PLOS journal article supplement (doi:10.1371/journal.pone.0018801), 2011-04-20
Supplement: S4 (10.1371/journal.pone.0018801.s004) [file journal.pone.0018801.s004]

**Table S3 – Additional information about toxicity**

| <b>Prostate</b>     |                                      |                                                                                                                                                                                                                                                                                                                                                                                                                                        |
|---------------------|--------------------------------------|----------------------------------------------------------------------------------------------------------------------------------------------------------------------------------------------------------------------------------------------------------------------------------------------------------------------------------------------------------------------------------------------------------------------------------------|
| <b>Reference</b>    | <b>Toxicity criteria</b>             | <b>Toxicity</b>                                                                                                                                                                                                                                                                                                                                                                                                                        |
| Barrou, 2004        | NIH/NCI-CTC                          | 4 patients grade 1/2 (rash, asthenia, halitosis)                                                                                                                                                                                                                                                                                                                                                                                       |
| Burch, 2000         | NIH/NCI-CTC                          | 5 patients fever grade 1/2<br>5 patients local reactions grade 1/2<br>5 patients myalgia grade 1/2                                                                                                                                                                                                                                                                                                                                     |
| Fong, 2001          | NIH/NCI-CTC                          | 2 patients fever grade 1/2<br>3 patients local reactions grade 1/2<br>1 patient painful swollen LN grade 1/2<br>5 patients with elevated ANA-titer and 1 patient with elevated RF ('clinical irrelevant')                                                                                                                                                                                                                              |
| Fuessel, 2006       | No grading                           | No immediate or delayed toxicity                                                                                                                                                                                                                                                                                                                                                                                                       |
| Heiser, 2002        | Not specified but toxicities graded  | 4 patients fever grade 1/2 (with flu-like symptoms)<br>4 patients local reactions grade 1/2                                                                                                                                                                                                                                                                                                                                            |
| Higano, 2009        | NIH/NCI-CTC                          | Only information on integrated data including trial D9901 (Small, 2006):<br>Events occurring at higher rate than in placebo group were chills, pyrexia, headache, ashenia, dyspnea, vomiting, and tremor (primarily grade 1/2).<br>Any adverse event grade 3/4 33.3% in treatment vs. 27.6% in placebo group (ns).<br>'Possibly increased risk' of cerebrovascular events in treatment group (7.5%) compared to 2.6% in placebo group. |
| Hildenbrand, 2007   | NIH/NCI-CTC                          | 11 patients fever grade grade 1/2<br>11 patients local reactions grade 1/2<br>1 patient insomnia grade 3<br>6 patients bone pain grade 1/2<br>3 patients articular pain grade 1/2                                                                                                                                                                                                                                                      |
| Kantoff, 2010       | NIH/NCI-CTC                          | Events reported more frequently in treatment than in placebo group were chills, fever, headache, influenza-like illness, myalgia, hypertension, hyperhydrosis, groin pain<br>Adverse events grade 3 or higher in 23/338 patients of treatment group vs. 3/168 patients of placebo group.<br>No difference for cerebrovascular events in treatment group (8/337 patients) vs. placebo group (3/168 patients).                           |
| Mu, 2005            | NIH/NCI-CTC                          | 'Some local reactions' grade 1                                                                                                                                                                                                                                                                                                                                                                                                         |
| Murphy, 2000        | Not specified                        | 'Minimal' (fever, fatigue, muscle cramps)                                                                                                                                                                                                                                                                                                                                                                                              |
| Pandha, 2004        | Not specified                        | 'Minimal local reactions'                                                                                                                                                                                                                                                                                                                                                                                                              |
| Perambakam, 2006    | n.e.                                 | n.e.                                                                                                                                                                                                                                                                                                                                                                                                                                   |
| Small, 2000         | NIH/NCI-CTC                          | 13 patients fever grade 1/2<br>2 patients fever grade 3/4<br>2 patients myalgia grade 1/2<br>5 patients urinary complains grade 1/2                                                                                                                                                                                                                                                                                                    |
| Small, 2006         | NIH/NCI-CTC                          | 49 patients rigor, 32 fatigue, 24 pyrexia, 8 tremor, 7 feeling cold<br>20 patients with toxicity grade 3/4<br>'More toxicities in treated group than in placebo group'                                                                                                                                                                                                                                                                 |
| Su, 2005            | Analogue NIH/NCI-CTC                 | 18 patients local reactions grade 1/2<br>4 patients fatigue or flu-like symptoms grade 1/2                                                                                                                                                                                                                                                                                                                                             |
| Thomas-Kaskel, 2006 | WHO criteria                         | No immediate or delayed toxicity                                                                                                                                                                                                                                                                                                                                                                                                       |
| Waeckerle-Men, 2006 | Not specified, but toxicities graded | 1 patient fever grade 1/2<br>5 patients local reactions grade 1/2<br>1 patient nausea grade 1/2                                                                                                                                                                                                                                                                                                                                        |

| RCC                    |                                      |                                                                                                                                                                                                                                                                                                                                                                                                                                                                                                                                                                                                                                                       |
|------------------------|--------------------------------------|-------------------------------------------------------------------------------------------------------------------------------------------------------------------------------------------------------------------------------------------------------------------------------------------------------------------------------------------------------------------------------------------------------------------------------------------------------------------------------------------------------------------------------------------------------------------------------------------------------------------------------------------------------|
| Reference              | Toxicity criteria                    | Toxicity                                                                                                                                                                                                                                                                                                                                                                                                                                                                                                                                                                                                                                              |
| Berntsen, 2008         | NIH/NCI-CTC                          | 17 patients influenza-like illness grade 1/2<br>16 patients fatigue grade 1/2<br>9 patients fever grade 1/2<br>9 patients local reactions grade 1/2<br>7 patients nausea grade 1/2<br>5 patients sweating grade 1/2<br>5 patients coughing grade 1/2<br>3 patients vomiting grade 1/2<br>2 patients rash grade 1/2<br>1 patient depression grade 1/2                                                                                                                                                                                                                                                                                                  |
| Bleumer, 2007          | Not specified, but toxicities graded | Some flu-like symptoms<br>Local reactions in 'most' patients, never > grade 2                                                                                                                                                                                                                                                                                                                                                                                                                                                                                                                                                                         |
| Danull, 2005           | Not specified                        | 'Without any major clinical toxicities or evidence of autoimmunity'.                                                                                                                                                                                                                                                                                                                                                                                                                                                                                                                                                                                  |
| Gitlitz, 2003          | NIH/NCI-CTC                          | 3 patients fatigue grade 1/2<br>1 patient nausea grade 1/2<br>1 patient diarrhea grade 1/2                                                                                                                                                                                                                                                                                                                                                                                                                                                                                                                                                            |
| Hötl, 2002             | Not specified but toxicities graded  | 8 patients fever grade 1/2                                                                                                                                                                                                                                                                                                                                                                                                                                                                                                                                                                                                                            |
| Kim, 2007              | NIH/NCI-CTC                          | 7 patients fever grade 1/2<br>9 patients local reactions grade 1/2<br>9 patients with myalgia, headache, skin rash, lipase elevation or renal insufficiency grade 1/2                                                                                                                                                                                                                                                                                                                                                                                                                                                                                 |
| Märten, 2002           | Not specified                        | No toxicity                                                                                                                                                                                                                                                                                                                                                                                                                                                                                                                                                                                                                                           |
| Oosterwijk-Wakka, 2002 | NIH/NCI-CTC                          | 5 patients local reactions grade 1/2                                                                                                                                                                                                                                                                                                                                                                                                                                                                                                                                                                                                                  |
| Schwaab, 2009          | Not specified, but toxicities graded | Toxicities interpreted as IL2 and IFN- $\alpha$ 2a related; grade 3/4:<br>9 patients rash with or without pruritus<br>6 patients hypotension or hypertension<br>10 patients electrolyte or metabolic changes<br>3 patients cytopenia<br>1 patient myalgia<br>3 patients confusion<br>3 patients infection<br>4 patients edema<br>1 patients pulmonary toxicity<br>2 patients renal function<br>3 patients cardiac side effects<br>1 patient deep venous thrombosis<br>1 patient diarrhoea<br>1 patient nausea<br>1 patient syncope<br>In two patients toxicity interpreted as autoimmune syndrome (therefore 1 patient removed before his 5th cycle). |
| Su, 2003               | Not specified but toxicities graded  | 5 patients local reactions grade 1/2                                                                                                                                                                                                                                                                                                                                                                                                                                                                                                                                                                                                                  |
| Wei, 2007              | Adverse events (AE) described        | 9 patients with fever<br>Variety of other toxicities 'most of these disease or IL-2 related'<br>No SAE                                                                                                                                                                                                                                                                                                                                                                                                                                                                                                                                                |
| Wierecky, 2006         | Not specified                        | Not described                                                                                                                                                                                                                                                                                                                                                                                                                                                                                                                                                                                                                                         |
